# Supplementary material
Source: PubMed Central journal article supplement (PMC6379085)
Supplement: NIHMS1508551-supplement-APPENDIX.pdf [file NIHMS1508551-supplement-APPENDIX.pdf]

## APPENDIX

**Appendix A.** Gene identification and primer sets used for realtime PCR reactions. Accession numbers provided for each gene of interest. Primer sets were obtained from PrimerBank (Spandidos et al., 2010) or generated *de novo* using PRIMER3 software. All primer sets were validated before use (See Garcia et al. 2014).

| Gene name      | Accession #  | Gene Function                                   | Forward primer (5'–3')    | Reverse Primer (5'–3')    |
|----------------|--------------|-------------------------------------------------|---------------------------|---------------------------|
| <i>HTR1A</i>   | NM_008308    | 5HT <sub>1A</sub>                               | ACTCACCTCTCACAGTATCCA     | CTTTTGCTCCTTACCTCCTCTAC   |
| <i>HTR2A</i>   | NM_172812    | 5HT <sub>2A</sub>                               | CGAAGCCTCGAACTGGACAAT     | CCGCAATGGTGAGAATAATCACG   |
| <i>HTR2C</i>   | NM_008312    | 5HT <sub>2C</sub>                               | TGCTGGTGGGACTACTTGTC      | GACGCAGTTGAAAATAGCACATC   |
| <i>HTR7</i>    | NM_008315    | 5HT <sub>7</sub>                                | TGAGAGAAGCGAGTTTGTGC      | AGTTCTGTTGTGCAGTCTCAG     |
| <i>CHRNA2</i>  | NM_144803    | Nicotinic $\alpha$ 2                            | TTATCTCTGGTGTCTGCTTCTGA   | CCCAGCGATTGTAGCCTCC       |
| <i>CHRNA3</i>  | NM_145129    | Nicotinic $\alpha$ 3                            | TCCAGTTTGAGGTGTCTATGTCT   | TGGTAGTCAGAGGGTTTCCATTT   |
| <i>CHRNA4</i>  | NM_015730    | Nicotinic $\alpha$ 4                            | CTAGCAGCCACATAGAGACCC     | GACAAGCCAAAGCGGACAAG      |
| <i>CHRNA5</i>  | NM_176844    | Nicotinic $\alpha$ 5                            | ATCCTCTGTGCAAAACATGA      | TCCACGTCCACTAAGTGTGAT     |
| <i>CHRNA6</i>  | NM_021369    | Nicotinic $\alpha$ 6                            | TAAAGGCAGTACAGGCTGTGA     | AAAATGCACCGTGACGGGAT      |
| <i>CHRNA7</i>  | NM_007390    | Nicotinic $\alpha$ 7                            | CACATTCACACCAACGTCTT      | AAAAGGGAACCAGCGTACATC     |
| <i>CHRM2</i>   | NM_203491    | Muscarinic M2                                   | TGTGATTGGCTACTGGCCTTT     | GGGTAGGTTAGAGGTTTTGTGAC   |
| <i>CHRM4</i>   | NM_007699    | Muscarinic M4                                   | AGATGGTGTTCATTGCGACAG     | GAGAACGCCCTATGATGAGA      |
| <i>GLRA1</i>   | NM_020492    | Glycine $\alpha$ 1                              | CCGCCCTCAACTTTGTGTCT      | GGGGAAACCGATGCGAGATA      |
| <i>GLRA2</i>   | NM_183427    | Glycine $\alpha$ 2                              | CATCCCTCGACAGCCCTATCT     | CCAGCCGTGAATCATTCCAC      |
| <i>GLRA3</i>   | NM_080438    | Glycine $\alpha$ 3                              | AGTGCGGATCTCGAAGTG        | ATGGAGCCAAAGCTGTTTTATGA   |
| <i>GLRA4</i>   | NM_010297    | Glycine $\alpha$ 4                              | TCCCCAGCCTACTCATCGTC      | CAAGCAAGGCAGCAAATACAAA    |
| <i>GABBR1</i>  | NM_019439    | GABA-Br1                                        | ACGTCACCTCGAAGGTTG        | CACAGGCAGGAAATTGATGGC     |
| <i>GABBR2</i>  | NM_001081141 | GABA-Br2                                        | AAGACCCCATAGAGGACATCAA    | GGGTGGTACGTGTCTGTGG       |
| <i>GABRA1</i>  | NM_010250    | GABA-Ar1                                        | AAAAGTCGGGGTCTCTCTGAC     | CAGTCGGTCCAAAATCTTTGTGA   |
| <i>GABRA3</i>  | NM_008067    | GABA-Ar3                                        | ATGTGGCACTTTTATGTGACCA    | CCCAGGTTCTTGTCTGCTTG      |
| <i>GABRA5</i>  | NM_176942    | GABA-Ar5                                        | TGACCCAAACCCCTCCTGTCT     | GTGATGTTGTCATTGGTCTCGT    |
| <i>SERT</i>    | NM_010484    | 5HT transporter                                 | CTCCGCAGTCCCAGTACAAG      | CTCCGCAGTCCCAGTACAAG      |
| <i>ACHE</i>    | NM_009599    | Acetylcholin-esterase                           | CTCCCTGGTATCCCCTGCATA     | GGATGCCAGAAAAGCTGAGA      |
| <i>CACNA1A</i> | NM_007578    | P/Q-type Ca <sup>2+</sup> (Ca <sub>v</sub> 2.1) | AAAGGCTCCTACCTGAGGAAT     | CTCAGTGTCCGTAGGTCAAC      |
| <i>CACNA1B</i> | NM_007579    | N-type Ca <sup>2+</sup> (Ca <sub>v</sub> 2.2)   | ACAACGTCTCCGCAAATAC       | CAGGGCCAGAACAAATGCAGT     |
| <i>CACNA1C</i> | NM_001159534 | L-type Ca <sup>2+</sup> (Ca <sub>v</sub> 1.2)   | GGAGGCGGTGCAATAAGCATT     | AGGAAGAGATACTCCAATCGTTC   |
| <i>CACNA1D</i> | NM_001083616 | L-type Ca <sup>2+</sup> (Ca <sub>v</sub> 1.3)   | GCTTACGTTAGGAATGGATGGAA   | GAAGTGGTCTTAACACTCGGAAG   |
| <i>CACNA1E</i> | NM_009782    | R-type Ca <sup>2+</sup> (Ca <sub>v</sub> 2.1)   | CAGTCCGGCAGAACTGTTTCA     | GAGACATTGGGGTCTTGTCTATC   |
| <i>CACNA1G</i> | NM_001112813 | T-type Ca <sup>2+</sup> (Ca <sub>v</sub> 3.1)   | AGAGTCCGCTGACCATGAAAT     | CCGGAATGTGTGCGAGATCA      |
| <i>KCNN1</i>   | NM_032397    | K <sub>Ca</sub> 2.1                             | CAAGCGGGTCAAAAATGCTG      | GAAGGAACCTACGCTGGTGT      |
| <i>KCNN2</i>   | NM_080465    | K <sub>Ca</sub> 2.2                             | AGCCGGAGCACACAATCTA       | CCCAGTCTAGCCGATG          |
| <i>KCNN3</i>   | NM_080466    | K <sub>Ca</sub> 2.3                             | CTCGGAGAAACCTTATCGAGGC    | GGTTGTGGGTACGGTTGGG       |
| <i>KCNMA1</i>  | NM_010610    | K <sub>Ca</sub> 1.1                             | CAGGCAGATGGTACTCTCAAGC    | TTGGGTTTGACGAGTCTATGAAG   |
| <i>KCNA1</i>   | NM_010595    | K <sub>V</sub> 1.1                              | CCCCTCCTACCCCTCTTC        | CTGCCGATTGAGACTCT         |
| <i>KCNA2</i>   | NM_008417    | K <sub>V</sub> 1.2                              | GTCTGAGCTTCTGCAGGAAA      | CCTATTTGTGTATCTGTGCCATC   |
| <i>KCNA3</i>   | NM_008418    | K <sub>V</sub> 1.3                              | CTGCCATTACCTTGTCTGTT      | CAGTAAAGCCACTTCTCCA       |
| <i>KCNA4</i>   | NM_021275    | K <sub>V</sub> 1.4                              | GAAAGCAGGAAATGAAGAGCATC   | GTTGACAGGTGAAAAGG         |
| <i>KCNA5</i>   | NM_145983    | K <sub>V</sub> 1.5                              | GCAGAGCTTCCAAGCAGAAG      | TCTTCAATACCCAGAAAAGCTC    |
| <i>KCNA6</i>   | NM_013568    | K <sub>V</sub> 1.6                              | CAGAGAAGTTCAAGATCGGGTA    | ATTTCTGCTTGGGATGAGGAC     |
| <i>KCNB1</i>   | NM_008420    | K <sub>V</sub> 2.1                              | GGTGGAGAGGACAATGAACA      | GAGTTCGACAACACGTGCT       |
| <i>KCNB2</i>   | NM_001098528 | K <sub>V</sub> 2.2                              | AAGTGTGTTGAGAGACAGAGC     | TTGCTGGAGAAAACCTAACTCG    |
| <i>KCNC1</i>   | NM_001112739 | K <sub>V</sub> 3.1                              | TTCCGGTCTTGTTCACGATGG     | CCCTACTCATCCCGCTACG       |
| <i>KCNC2</i>   | NM_001025581 | K <sub>V</sub> 3.2                              | TTGTGTCTCCTTTAGTCTGTGC    | AACGTGTTTCTGTTGACGA       |
| <i>KCNC3</i>   | NM_008422    | K <sub>V</sub> 3.3                              | CACAATGCTGCTCAGGCT        | GAAGACAAGAGCCCAATCACT     |
| <i>KCNC4</i>   | NM_145922    | K <sub>V</sub> 3.4                              | CTTGGCAGGTCTCTGTGTT       | GGACTATGCCTGTGCTGATG      |
| <i>KCND2</i>   | NM_019697    | K <sub>V</sub> 4.2                              | CTGTGGTCACGTAAGGTTGT      | GTGCAAGAAGTCAAGTCAATTCAG  |
| <i>KCND3</i>   | NM_001039347 | K <sub>V</sub> 4.3                              | ATCGAGCTCTCCATGCAG        | CAAGACCACCTCACTCATCG      |
| <i>KCNQ1</i>   | NM_008434    | K <sub>V</sub> 7.1                              | GTAAGTCTCGATGACATCTCG     | CCCATACCCATGTGTCA         |
| <i>SCN8A</i>   | NM_001077499 | Na <sub>v</sub> 1.6                             | GTGACGAAATCAAAGACAATCCC   | GACATGAGGAACGAAGAAGTACTAC |
| <i>SLC12A5</i> | NM_020333    | Cl <sup>-</sup> /K <sup>+</sup> symporter       | ATGTCTTCTCGTAGGTGTATGC    | GACCACGTTTCTGTACCACTT     |
| <i>ACTB</i>    | NM_007393    | Beta-actin                                      | GATGACCCAGATCATGTTTGAGACC | AGATGGGCACAGTGTGGGTGA     |
| <i>GAPDH</i>   | NM_008084    | Glyceraldehyde 3-phosphate dehydrogenase        | TGCACCACCACCTGCTTAGC      | GGCATGGACTGTGGTTCATGAG    |

**Appendix B.** ANOVA results for mRNA levels across cord levels and injury. Values for *F* and *P* for two-way ANOVAs are reported for the interaction of 2 slice levels (motor- and interneuron) and injury (SCI and control). *P*-values lower than 0.05 are noted in bold.

| Gene name      | <i>F</i><br>(Level) | <i>P</i><br>(Level) | <i>F</i><br>(Injury) | <i>P</i><br>(Injury) | <i>F</i> (Interaction) | <i>P</i> (Interaction) |
|----------------|---------------------|---------------------|----------------------|----------------------|------------------------|------------------------|
| <i>HTR1A</i>   | 34.575              | <0.001              | 16.682               | <0.001               | 0.324                  | 0.573                  |
| <i>HTR2A</i>   | 0.113               | 0.739               | 3.650                | 0.065                | 19.754                 | <0.001                 |
| <i>HTR2C</i>   | 58.618              | <0.001              | 0.00418              | 0.949                | 4.953                  | <b>0.033</b>           |
| <i>HTR7</i>    | 33.097              | <0.001              | 0.0961               | 0.759                | 5.569                  | <b>0.024</b>           |
| <i>CHRNA2</i>  | 4.227               | <b>0.048</b>        | 28.659               | <0.001               | 21.367                 | <0.001                 |
| <i>CHRNA3</i>  | 122.144             | <0.001              | 19.722               | <0.001               | 7.50                   | <b>0.010</b>           |
| <i>CHRNA4</i>  | 119.458             | <0.001              | 18.417               | <0.001               | 0.493                  | 0.488                  |
| <i>CHRNA5</i>  | 1.698               | 0.202               | 1.993                | 0.168                | 0.159                  | 0.693                  |
| <i>CHRNA6</i>  | 0.899               | 0.350               | 11.220               | <b>0.002</b>         | 1.414                  | 0.243                  |
| <i>CHRNA7</i>  | 21.250              | <0.001              | 12.821               | <b>0.001</b>         | 2.107                  | 0.156                  |
| <i>CHRM2</i>   | 9.239               | <b>0.005</b>        | 46.010               | <0.001               | 4.675                  | <b>0.038</b>           |
| <i>CHRM4</i>   | 1.721               | 0.199               | 0.113                | 0.739                | 1.940                  | 0.173                  |
| <i>GLRA1</i>   | 13.443              | <0.001              | 19.594               | <0.001               | 0.734                  | 0.398                  |
| <i>GLRA2</i>   | 98.336              | <0.001              | 0.273                | 0.605                | 4.827                  | <b>0.035</b>           |
| <i>GLRA3</i>   | 89.110              | <0.001              | 8.088                | <b>0.007</b>         | 1.718                  | 0.199                  |
| <i>GABBR1</i>  | 18.695              | <0.001              | 0.0079               | 0.930                | 19.507                 | <0.001                 |
| <i>GABBR2</i>  | 6.406               | <b>0.016</b>        | 1.847                | 0.184                | 26.804                 | <0.001                 |
| <i>GABRA1</i>  | 29.977              | <0.001              | 0.0326               | 0.858                | 0.655                  | 0.424                  |
| <i>GABRA3</i>  | 66.594              | <0.001              | 1.531                | 0.224                | 0.017                  | 0.897                  |
| <i>GABRA5</i>  | 71.280              | <0.001              | 3.180                | 0.083                | 1.091                  | 0.304                  |
| <i>ACHE</i>    | 49.189              | <0.001              | 13.185               | <0.001               | 0.887                  | 0.353                  |
| <i>CACNA1A</i> | 9.328               | <b>0.004</b>        | 0.00285              | 0.958                | 3.865                  | 0.058                  |
| <i>CACNA1B</i> | 44.325              | <0.001              | 3.548                | 0.068                | 5.582                  | <b>0.024</b>           |
| <i>CACNA1C</i> | 47.365              | <0.001              | 25.546               | <0.001               | 31.136                 | <0.001                 |
| <i>CACNA1D</i> | 8.935               | <b>0.005</b>        | 11.529               | <b>0.002</b>         | 22.019                 | <0.001                 |
| <i>CACNA1E</i> | 39.226              | <0.001              | 0.713                | 0.404                | 1.090                  | 0.304                  |
| <i>CACNA1G</i> | 3.338               | 0.076               | 20.730               | <0.001               | 4.844                  | <b>0.035</b>           |
| <i>KCNN1</i>   | 30.252              | <0.001              | 5.777                | <b>0.022</b>         | 54.369                 | <0.001                 |
| <i>KCNN2</i>   | 18.519              | <0.01               | 1.619                | 0.212                | 30.776                 | <0.001                 |
| <i>KCNN3</i>   | 22.848              | <0.001              | 39.580               | <0.001               | 16.225                 | <0.001                 |
| <i>KCNMA1</i>  | 12.602              | <b>0.001</b>        | 1.050                | 0.313                | 21.024                 | <0.001                 |
| <i>KCNA1</i>   | 0.635               | 0.431               | 1.188                | 0.283                | 8.852                  | <b>0.005</b>           |
| <i>KCNA2</i>   | 23.147              | <0.001              | 7.505                | <b>0.010</b>         | 3.777                  | 0.060                  |
| <i>KCNA3</i>   | 64.577              | <0.001              | 34.750               | <0.001               | 0.632                  | 0.433                  |
| <i>KCNA6</i>   | 2.473               | 0.125               | 0.113                | 0.738                | 0.039                  | 0.844                  |
| <i>KCNB1</i>   | 0.021               | 0.886               | 0.410                | 0.526                | 10.349                 | <b>0.003</b>           |
| <i>KCNB2</i>   | 10.112              | <b>0.003</b>        | 0.002                | 0.963                | 0.584                  | 0.450                  |
| <i>KCNC3</i>   | 1.996               | 0.167               | 0.268                | 0.608                | 18.398                 | <0.001                 |
| <i>KCNC4</i>   | 2.663               | 0.112               | 0.001                | 0.972                | 18.827                 | <0.001                 |
| <i>KCND2</i>   | 70.159              | <0.001              | 1.179                | 0.286                | 25.838                 | <0.001                 |
| <i>SCN8A</i>   | 43.839              | <0.001              | 40.502               | <0.001               | 100.155                | <0.001                 |
| <i>SLC12A5</i> | 1.972               | 0.170               | 0.014                | 0.908                | 0.243                  | 0.625                  |

(Received 14 May 2018, Accepted 24 September 2018)  
(Available online 30 September 2018)
